# Supplementary material
Source: Research Square preprint supplement (doi:10.21203/rs.3.rs-9168975/v1)

**Supplementary material**

**Tables**

**Table S1.** (Sub-)Themes in experiences of facilitation between healthy behaviors, PA and HD, and personal values.

| **Theme/sub-theme** | **Mentions (n)** | **Quote** |
| --- | --- | --- |
| **1.2 PA facilitates hedonism** |  |  |
| Sub-theme: Positive affective attitudes towards PA | 45 | ‘’Eating clean and going to gym gives you feel good effect and that feel good effect translates, I feel good today, today is a good day and so forth. I feel good about myself and about my life.’’ (51) |
| Sub-theme: Accomplishing PA goals | 5 | ‘’I enjoy the process yea I know that especially once I finish I’m gonna enjoy it a lot and I’m gonna do stuff to relax.’’ (74) |
| **1.2 PA facilitates stimulation** |  |  |
| Sub-theme: Sense of change | 28 | ‘’Yeah, uh, when I exercise. I can like go out from this routine and I can do a life changing or a daily changing activity, uh it's good for my health. Uh, instead of being in this routine.’’ (18) |
| Sub-theme: Enjoyment of PA depends on the social and physical context | 9 | ‘’Yeah, it's like something new, something new to see because I choose different paths. I explore.’’ (75) |
| **1.3 PA facilitates self-direction** |  |  |
| Sub-theme: Sense of independence | 21 | ‘’It was about the freedom and everything it’s when you choose to do sports and you do whatever you want, and if you want to do this one sports or another you can do it whenever you want wherever you want it’s really about the freedom.’’ (39) |
| **1.4 PA facilitates achievement** |  |  |
| Sub-theme: Sense of achievement | 35 | ‘’And you also show yourself that you are capable, if this is your goal and you do it, you, you show yourself. And also a bit being ambitious because it's easier to sit on the couch or eat a donut.’’ (66) |
| Sub-theme: PA facilitates accomplishing other life goals | 7 | ‘’I think it’s about personal achievement, sports is mostly about reaching goals, pushing, and always trying to do more and better so it’s really important for the mind. I think that reaching goals in sports can help to reach goals in other fields.’’ (39) |
| **1.5 PA facilitates power** |  |  |
| Sub-theme: Society’s perceptions | 23 | ‘’I saw that when I say to people that I walk to school and it's like 35 to 40 minutes. They're like oh you're, you're very healthy.’’ (21) |
| **1.6 PA facilitates tradition** |  |  |
| Sub-theme: Cultural values | 5 | ‘’I was thinking about the fact that, how can I say that, it is kind of a tradition to maintain a good form, good health, so this aspect, I can remember my grandmother she was still exercising when she was like 80 years old.’’ (34) |
| **1.7 PA facilitates conformity** |  |  |
| Sub-theme: PA involves self-discipline | 15 | ‘’When you practice yoga regularly. When you abide by those principles of the yogic philosophy, you actually become more disciplined, so you actually foster self-discipline.’’ (36) |
| Sub-theme: Social norms | 3 | ‘’I would say uh it's more about…to look a certain way. Do exercises to like, yeah, look a certain way.’’ (34) |
| **1.8 PA facilitates security** |  |  |
| Sub-theme: PA prevents risk of injury | 4 | ‘’For me it's a great safety to do sports. In the sense that if I'm in good shape with my body, I have less risk of injuring myself and... Whether it's through balance, my, my muscles, you know. The condition of the body, that's essential.’’ (79) |
| Sub-theme: PA promotes social security | 3 | ‘’Reciprocity, belonging to a team and all of that.’’ (17) |
| **1.9 PA facilitates universalism** |  |  |
| Sub-theme: PA is environmentally friendly | 1 | ‘’Sometimes it helps to change your insight, insights from the world, it's (walking) very environmental friendly.’’ (37) |
| **1.10 PA facilitates benevolence** |  |  |
| Sub-theme: Role of PA in improving relationships | 20 | “doing sports, it helps you to be calmer and more relaxed and not being angry. Because when you're angry and you're doing sports it you, it helps you to relax. So I feel like it's a good, uh, way to relieve stress and achieve benevolence to be more caring, more calm, more relaxed around people and with your friends.” (43) |
| **2.1 HD facilitates hedonism** |  |  |
| Sub-theme: Positive affective attitudes towards HD | 21 | ‘’Even food in itself can be a pleasure if I learn to cook, if I make some good stuff.’’ (30) |
| Sub-theme: Accomplishing HD goals | 2 | ‘’It’s also about like satisfaction…also it's connected with achievement if you achieve your goals yea, you also feel happy.’’ (49) |
| **2.2 HD facilitates stimulation** |  |  |
| Sub-theme: Sense of change | 19 | ‘’If you, let's say two days, you know, three days in a row, you, you taste like, you try a new recipe and it's good and it's easy to do and easy to redo it like, it gives you the motivation to do it week after week.’’ (84) |
| **2.3 HD facilitates self-direction** |  |  |
| Sub-theme: Sense of independence | 11 | ‘’I can depend on myself to create my own, my own meal plan. So usually before I would have to, like, maybe ask for help, from a personal trainer or whatever, but now, because yeah, because of this independence that I have, it's now much easier.’’ (51) |
| **2.4 HD facilitates achievement** |  |  |
| Sub-theme: Sense of achievement | 12 | ‘’So basically by eating clean I can, yeah reach a goal that is, I know for sure it just needs time to reach it, which is the success factor. And for competition, I guess it's just because everyone around me does not follow a strict diet. I feel like yeah, I'm I'm in competition to be the, the one that is leading the or is following the best diet I guess.’’ (51) |
| Sub-theme: HD facilitates accomplishing other life goals | 6 | ‘’Yeah, I don't think eating less junk food makes it that dramatic of a difference, maybe like a little bit in terms of like uh, uh researching and studying and stuff like, in terms of like having clear thoughts.’’ (63) |
| **2.5 HD facilitates power** |  |  |
| Sub-theme: Sense of personal empowerment | 3 | ‘’If I achieve it, I will feel like more proud of myself and also like almost, like more valuable. Because it's like, I'm thinking like if I have kids, I would like to be able to cook for them like good things.’’ (84) |
| Sub-theme: Society’s perceptions | 4 | ‘’Like being healthy. I think in society is considered as a good value…by being healthy you might have better social recognition.’’ (66) |
| **2.6 HD facilitates tradition** |  |  |
| Sub-theme: Cultural values | 8 | ‘’We're losing the knowledge of cooking of our own like traditional plates and dishes and like find, finding some time to cook I think it's a good way to keep on with our traditions.’’ (52) |
| **2.7 HD facilitates conformity** |  |  |
| Sub-theme: Sense of self-discipline | 8 | ‘’Despite what's around you, despite the the food around you or whatever, you still maintain proper diet.’’ (51) |
| Sub-theme: Social norms | 4 | ‘’I think because today it is more well seen to eat healthy food rather than junk food or fatty food.’’ (39) |
| **2.8 HD facilitates security** |  |  |
| Sub-theme: HD improves health | 3 | ‘’It's also about the product, how I think if the products are from the seasons they are more fresh so you are more sure that the product it’s not with the chemicals, and maybe if you eat local it’s…organic.’’ (50) |
| **2.9 HD facilitates universalism** |  |  |
| Sub-theme: HD is environmentally friendly | 6 | ‘’I think eating plant-based food is the most ,the best way to be really in, in balance with the nature and because we don't kill animals, we don't make any, make anyone suffer and, and you use the least resources that you can.’’ (69) |
| **2.10 HD facilitates benevolence** |  |  |
| Sub-theme: Role of HD in improving relationships | 12 | ‘’When you’re cooking for other people it’s like you take care of them and put a bit of love in your cooking.’’ (72) |

**Table S2**. (Sub-)Themes in experiences of conflict between healthy behaviors, PA and HD, and personal values.

| **Theme/sub-theme** | **Mentions (n)** | **Quote** |
| --- | --- | --- |
| **3.1 PA conflicts with hedonism** |  |  |
| Sub-theme: PA feels forceful | 5 | ‘’Going for walks and running, exercising basically. If you don't feel like it, you're. You can't just stay home. You have to go and do it.’’ (3) |
| Sub-theme: Need a break from PA | 3 | ‘’It just takes up time focusing on the fitness aspect and this is less time to go off and do other things and switch off.’’ (54) |
| Sub-theme: Physical fatigue from PA | 4 | ‘’Yes it’s uh, a little painful and not relaxing when you do it.’’ (78) |
| **3.2 PA conflicts with stimulation** |  |  |
| Sub-theme: Difficulty in achieving PA goals | 3 | ‘’Sometimes when I run too much, I have too difficult goals then. I can feel like I'm never getting there or it's so alone, but it doesn't last very long because I mean two weeks you can see difference. But sometimes it's like, oh, I'm tired. I I don't want to do this anymore.’’ (77) |
| **3.3 PA conflicts with self-direction** |  |  |
| Sub-theme: Lack of freedom | 2 | ‘’It's very regimented like what we have to do, and we don’t have too much autonomy over it.’’ (54) |
| **3.4 PA conflicts with achievement** |  |  |
| Sub-theme: PA conflicts with accomplishing other life goals | 5 | ‘’It's because, well, if I'm working out, I'm not working like on my like professional goals, so yeah, it's kind of, like you take time away from this.’’ (32) |
| **3.5 PA conflicts with power** |  |  |
| Sub-theme: Society’s perceptions | 2 | ‘’I was thinking about here preserving my public image because I may be shy or I may do something wrong or people making fun of me…if I make a mistake or something like that my acknowledgement will not be very well seen.’’ (43) |
| **3.6 PA conflicts with tradition** |  |  |
| Sub-theme: Social norms and cultural values | 3 | ‘’I think like for me culturally not a lot of women run.’’ (5) |
| **3.7 PA conflicts with Conformity** |  |  |
| Sub-theme: Difficulty in maintaining self-discipline | 1 | ‘’Because of discipline, the same. To be self-disciplined it’s hard sometimes.’’ (56) |
| **3.8 PA conflicts with security** |  |  |
| Sub-theme: PA risks personal safety | 7 | ‘’It's, uh, you might like hurt yourself or do it too much.’’ (84) |
| Sub-theme: Lack of social security | 1 | ‘’Because always gonna hurt yourself and also feel like you don't belong in certain sports.’’ (34) |
| **3.9 PA conflicts with universalism** |  |  |
| Sub-theme: Feeling disconnected from surroundings when practicing PA | 4 | ‘’I think because when you do sports you’re not really open to others so it’s complicated to feel that you are linked to other people around you. Because I think you’re more focused on yourself.’’ (72) |
| **3.10 PA conflicts with benevolence** |  |  |
| Sub-theme: Practicing PA alone | 7 | ‘’I think in the sense that you’re kind of spending that time and energy on something that it’s more about exercise, achievement etc. um maybe you have less time and less energy for these kind of human relationships.’’ (74) |
| **4.1 HD conflicts with hedonism** |  |  |
| Sub-theme: HD prevents enjoyable experience from food | 11 | ‘’So when you when you're dieting, you can't just go out to bars. Go do whatever you want. Basically, pursue pleasure however you see fit.’’ (3) |
| Sub-theme: Difficulty in resisting temptations | 3 | ‘’For me it's difficult to always eat healthy, and…I'm like an addict of sugar.’’ (65) |
| **4.2 HD conflicts with stimulation** |  |  |
| Sub-theme: Limited variety of foods when on a HD | 7 | “I think sometimes you…need to have some a new kick to like to keep on doing it every day.” (84) |
| **4.3 HD conflicts with self-direction** |  |  |
| Sub-theme: Negative affect | 1 | ‘’Because I have to be more creative when I cook, so it stresses me out a little bit.’’ (25) |
| **4.4 HD conflicts with achievement** |  |  |
| Sub-theme: HD conflicts with accomplishing other life goals | 1 | ‘’It's time consuming to have, eat healthy food, for example, I have a lot of to do list, and I have to prepare a healthy food as well.’’ (37) |
| **4.5 HD conflicts with power** |  |  |
| Sub-theme: Social norms | 2 | ‘’Very often it's difficult for example when you go to some conferences or some events with other people to ask, I mean not ask, but to show that you don't want to eat meat and or in general vegan, and so it it can appear like a a very strong position, maybe too strong in certain occasions.’’ (69) |
| **4.6 HD conflicts with tradition** |  |  |
| Sub-theme: Social norms and cultural values | 6 | ‘’When you have to go on your healthy diet and uh, you want to taste or have your traditional foods. It's not very possible because for example, our traditional foods or local foods are very fatty.’’ (37) |
| **4.7 HD conflicts with conformity** |  |  |
| Sub-theme: Difficulty in maintaining self-discipline | 1 | ‘’It’s about self-discipline, you try to do it but it's not always easy.’’ (50) |
| **4.8 HD conflicts with security** |  |  |
| Sub-theme: Lack of social security | 1 | ‘’Because you don’t feel also like you belong so that impacts your security.’’ (5) |
| **4.9 HD conflicts with universalism** |  |  |
| Sub-theme: Difficulty in maintaining an environmentally friendly diet | 1 | ‘’Eating healthy is also eating less meat you know buying some plastic and so on but sometimes like it can be difficult because yeah if I go to supermarket I don't have a lot of options.’’ (56) |
| **4.10 HD conflicts with benevolence** |  |  |
| Sub-theme: Negative affect | 1 | ‘’Because I feel like when I eat less sugar I become angrier.’’ (5) |

**Table S3**. Sample characteristics

|  | **Total Sample**  **(n = 78)** |
| --- | --- |
| **Age,** M (SD) | 24.62 (3.22) |
| **Gender** % (n)  *Female*  *Male* | 71.79 (56)  26.92 (21) |
| **Marital Status** % (n)  *Single*  *Unregistered partnership*  *Married or registered partnership*  *Divorced* | 64.10 (50)  21.79 (17)  12.82 (10)  1.28 (1) |
| **Highest degree obtained** % (n)  *University*  *Higher secondary school*  *Post-secondary non-university*  *Lower secondary school* | 73.07 (57)  23.07 (18)  2.56 (2)  1.28 (1) |
| **Current professional situation** % (n)  *Student*  *Employee*  *Job seeker*  *Other* (part-time, self-employee, trainee) | 44.87 (35)  35.89 (28)  15.38 (12)  3.84 (3) |
| **Self-perceived income sufficiency a** % (n)  **(ability to meet end needs)**  *With great difficulty*  *With difficulty*  *With some difficulty*  *Fairly easily*  *Easily*  *Very easily* | 3.84 (3)  10.25 (8)  19.23 (15)  28.20 (22)  24.35 (19)  5.12 (4) |

a n = 71 for this question

**Table S4**. Percentage of reported lower-level goalsover the whole sample

|  | **Selection, % (n)** |
| --- | --- |
| **Lower-level goal categories**  *Physical activity*  *Interpersonal*  *Healthy diet*  *Academic*  *Occupational*  *Leisure*  *Intrapersonal*  *Maintenance*  *Other health and body* | 85.89 (67)  66.66 (52)  64.10 (50)  65.38 (51)  57.69 (45)  52.56 (41)  46.15 (36)  29.48 (23)  29.48 (23) |

**Table S5**. Percentage of participants who perceived their health goal as both conflicting and facilitating with a value.

| **Health goal** | **Value** | **Percent (%)** |
| --- | --- | --- |
| Physical activity | Achievement | 24.24% |
|  | Benevolence | 13.04% |
|  | Conformity | 12.5% |
|  | Hedonism | 25.9% |
|  | Power | 23.9% |
|  | Security | 15.6% |
|  | Self-direction | 13.8% |
|  | Stimulation | 15.4% |
|  | Tradition | 30.8% |
|  | Universalism | 4.35% |
| Healthy diet | Achievement | 16% |
|  | Benevolence | 5.56% |
|  | Conformity | 15.8% |
|  | Hedonism | 50% |
|  | Power | 9.68% |
|  | Security | 9.68% |
|  | Self-direction | 14.9% |
|  | Stimulation | 36.1% |
|  | Tradition | 9.09% |
|  | Universalism | 4.55% |

**Table S6**. ANOVA results of LMM and GLMM models to test the effect of value category on vertical facilitation and conflict scores in PA and HD.

|  | **Results of LMM for**  **vertical facilitation** | | | | | | **Results of GLMM for**  **vertical conflict** | | |
| --- | --- | --- | --- | --- | --- | --- | --- | --- | --- |
|  | **Sum**  **sq** | **Mean sq** | **Numdf** | **Den**  **df** | **F** | **p** | **X2** | **df** | **p** |
| **Physical activity** |  |  |  |  |  |  |  |  |  |
| Value Category | 389.04 | 43.22 | 9 | 359.12 | 31.10 | < .001 | 15.18 | 9 | 0.08 |
| **Healthy diet** |  |  |  |  |  |  |  |  |  |
| Value Category | 139.89 | 15.54 | 9 | 272.71 | 7.45 | < .001 | 46.515 | 9 | < .001 |

*Notes*: Value category was considered as a fixed effect, and subject ID as a random intercept.

**Table S7.** Results of the Tukey post-hoc tests obtained on the LMM comparing between the different values in their vertical facilitation scores for PA and HD.

|  | **Physical activity** | | | | | **Healthy Diet** | | | | |
| --- | --- | --- | --- | --- | --- | --- | --- | --- | --- | --- |
| **Contrast** | **Estimate** | **SE** | **df** | **t** | **p** | **Estimate** | **SE** | **df** | **t** | **p** |
| Achievement - Benevolence | 2.009 | 0.230 | 356 | 8.745 | <.001 | 1.521 | 0.319 | 270 | 4.760 | .0001 |
| Achievement - Conformity | 1.834 | 0.290 | 360 | 6.320 | <.001 | 0.909 | 0.401 | 275 | 2.269 | .413 |
| Achievement - Hedonism | 0.063 | 0.219 | 355 | 0.285 | 1.00 | -0.091 | 0.304 | 269 | -0.298 | 1.00 |
| Achievement - Power | 0.760 | 0.243 | 357 | 3.129 | .059 | 0.492 | 0.336 | 272 | 1.464 | .905 |
| Achievement - Security | 2.567 | 0.231 | 356 | 11.088 | <.001 | 1.523 | 0.336 | 272 | 4.535 | .000 |
| Achievement - Self-direction | 0.204 | 0.206 | 352 | 0.989 | .993 | -0.460 | 0.294 | 267 | -1.566 | .863 |
| Achievement - Stimulation | 0.191 | 0.221 | 356 | 0.865 | .997 | 0.184 | 0.320 | 271 | 0.577 | .999 |
| Achievement - Tradition | 3.001 | 0.374 | 363 | 8.050 | <.001 | 0.817 | 0.501 | 277 | 1.631 | .832 |
| Achievement - Universalism | 1.237 | 0.295 | 361 | 4.186 | .002 | 0.393 | 0.379 | 274 | 1.036 | .990 |
| Benevolence - Conformity | -0.174 | 0.306 | 359 | -0.571 | .999 | -0.612 | 0.421 | 274 | -1.453 | .909 |
| Benevolence - Hedonism | -1.946 | 0.242 | 358 | -8.054 | <.001 | -1.611 | 0.334 | 272 | -4.821 | .0001 |
| Benevolence - Power | -1.249 | 0.264 | 359 | -4.736 | .001 | -1.029 | 0.363 | 274 | -2.833 | .131 |
| Benevolence - Security | 0.558 | 0.252 | 358 | 2.211 | .451 | 0.003 | 0.362 | 273 | 0.007 | 1.00 |
| Benevolence - Self-direction | -1.805 | 0.231 | 357 | -7.812 | <.001 | -1.981 | 0.325 | 271 | -6.104 | <.001 |
| Benevolence - Stimulation | -1.817 | 0.245 | 359 | -7.433 | <.001 | -1.336 | 0.347 | 272 | -3.850 | .006 |
| Benevolence - Tradition | 1.001 | 0.386 | 362 | 2.596 | .224 | -0.704 | 0.517 | 277 | -1.360 | .938 |
| Benevolence - Universalism | -0.772 | 0.311 | 360 | -2.484 | .281 | -1.128 | 0.403 | 275 | -2.801 | .141 |
| Conformity - Hedonism | -1.771 | 0.299 | 360 | -5.933 | <.001 | -0.999 | 0.411 | 274 | -2.434 | .310 |
| Conformity - Power | -1.074 | 0.315 | 359 | -3.410 | .025 | -0.417 | 0.433 | 274 | -0.964 | .994 |
| Conformity - Security | 0.733 | 0.307 | 359 | 2.391 | 0.335 | 0.614 | 0.433 | 274 | 1.418 | .921 |
| Conformity - Self-direction | -1.630 | 0.291 | 360 | -5.606 | <.001 | -1.369 | 0.404 | 275 | -3.386 | .028 |
| Conformity - Stimulation | -1.643 | 0.301 | 361 | -5.452 | <.001 | -0.725 | 0.422 | 274 | -1.718 | .784 |
| Conformity - Tradition | 1.176 | 0.424 | 362 | 2.773 | .150 | -0.092 | 0.573 | 278 | -0.161 | 1.00 |
| Conformity - Universalism | -0.597 | 0.359 | 363 | -1.662 | .816 | -0.516 | 0.469 | 277 | -1.100 | .985 |
| Hedonism - Power | 0.698 | 0.253 | 358 | 2.758 | .155 | 0.582 | 0.348 | 271 | 1.676 | .808 |
| Hedonism - Security | 2.504 | 0.241 | 355 | 10.393 | <.001 | 1.614 | 0.347 | 271 | 4.652 | .0002 |
| Hedonism - Self-direction | 0.142 | 0.219 | 355 | 0.645 | .999 | -0.370 | 0.310 | 270 | -1.194 | .973 |
| Hedonism - Stimulation | 0.129 | 0.232 | 356 | 0.555 | .999 | 0.275 | 0.333 | 271 | 0.826 | .998 |
| Hedonism - Tradition | 2.948 | 0.382 | 363 | 7.724 | <.001 | 0.908 | 0.511 | 278 | 1.775 | .750 |
| Hedonism - Universalism | 1.174 | 0.305 | 362 | 3.854 | .005 | 0.484 | 0.390 | 274 | 1.241 | .965 |
| Power - Security | 1.807 | 0.263 | 357 | 6.873 | <.001 | 1.032 | 0.373 | 271 | 2.765 | .154 |
| Power - Self-direction | -0.556 | 0.244 | 358 | -2.282 | .403 | -0.952 | 0.340 | 272 | -2.801 | .141 |
| Power - Stimulation | -0.569 | 0.256 | 358 | -2.222 | .443 | -0.307 | 0.361 | 272 | -0.850 | .998 |
| Power - Tradition | 2.250 | 0.394 | 362 | 5.709 | <.001 | 0.325 | 0.527 | 276 | 0.618 | .999 |
| Power - Universalism | 0.477 | 0.324 | 363 | 1.473 | .902 | -0.099 | 0.416 | 276 | -0.237 | 1.00 |
| Security - Self-direction | -2.363 | 0.233 | 357 | -10.148 | <.001 | -1.984 | 0.341 | 273 | -5.817 | <.001 |
| Security - Stimulation | -2.375 | 0.245 | 358 | -9.696 | <.001 | -1.339 | 0.361 | 272 | -3.712 | .009 |
| Security - Tradition | 0.443 | 0.388 | 362 | 1.143 | .980 | -0.706 | 0.527 | 277 | -1.341 | .943 |
| Security - Universalism | -1.330 | 0.315 | 363 | -4.217 | .001 | -1.130 | 0.415 | 275 | -2.720 | .171 |
| Self-direction - Stimulation | -0.013 | 0.222 | 355 | -0.057 | 1.000 | 0.645 | 0.325 | 272 | 1.985 | .610 |
| Self-direction - Tradition | 2.806 | 0.374 | 363 | 7.495 | <.001 | 1.277 | 0.505 | 278 | 2.528 | .258 |
| Self-direction - Universalism | 1.033 | 0.296 | 362 | 3.483 | .020 | 0.854 | 0.384 | 275 | 2.223 | .443 |
| Stimulation - Tradition | 2.819 | 0.382 | 362 | 7.382 | <.001 | 0.632 | 0.517 | 276 | 1.224 | .968 |
| Stimulation - Universalism | 1.046 | 0.305 | 360 | 3.431 | .023 | 0.208 | 0.399 | 272 | 0.522 | 1.00 |
| Tradition - Universalism | -1.773 | 0.434 | 366 | -4.089 | .002 | -0.424 | 0.559 | 279 | -0.758 | .999 |

*Notes:* Estimates are differences in estimated marginal means of vertical facilitation scores between the values in the contrasts column.

**Table S8.** Results of the Tukey post-hoc tests obtained on the GLMM (NB) comparing between the different values in their vertical conflict scores for HD

|  | **Healthy diet** | | | |
| --- | --- | --- | --- | --- |
| **Contrast** | **Estimate** | **SE** | **z** | **p** |
| Achievement - Benevolence | 0.441 | 0.492 | 0.895 | .997 |
| Achievement - Conformity | 0.064 | 0.564 | 0.114 | 1.00 |
| Achievement - Hedonism | -1.533 | 0.381 | -4.022 | .002 |
| Achievement - Power | 0.250 | 0.480 | 0.521 | 1.00 |
| Achievement - Security | 0.431 | 0.518 | 0.832 | .998 |
| Achievement - Self-direction | 0.624 | 0.456 | 1.368 | .937 |
| Achievement - Stimulation | -0.894 | 0.416 | -2.149 | .493 |
| Achievement - Tradition | 0.405 | 0.804 | 0.503 | 1.00 |
| Achievement - Universalism | 2.013 | 1.094 | 1.840 | .710 |
| Benevolence - Conformity | -0.376 | 0.619 | -0.608 | .999 |
| Benevolence - Hedonism | -1.973 | 0.475 | -4.153 | .001 |
| Benevolence - Power | -0.191 | 0.559 | -0.341 | 1.00 |
| Benevolence - Security | -0.009 | 0.570 | -0.016 | 1.00 |
| Benevolence - Self-direction | 0.183 | 0.535 | 0.343 | 1.00 |
| Benevolence - Stimulation | -1.335 | 0.497 | -2.685 | .180 |
| Benevolence - Tradition | -0.036 | 0.844 | -0.042 | 1.00 |
| Benevolence - Universalism | 1.573 | 1.126 | 1.397 | 0.929 |
| Conformity - Hedonism | -1.597 | 0.545 | -2.931 | 0.097 |
| Conformity - Power | 0.186 | 0.621 | 0.299 | 1.00 |
| Conformity - Security | 0.367 | 0.624 | 0.588 | 0.999 |
| Conformity - Self-direction | 0.559 | 0.601 | 0.930 | 0.996 |
| Conformity - Stimulation | -0.959 | 0.567 | -1.690 | 0.802 |
| Conformity - Tradition | 0.340 | 0.854 | 0.399 | 1.00 |
| Conformity - Universalism | 1.949 | 1.152 | 1.692 | .801 |
| Hedonism - Power | 1.783 | 0.462 | 3.863 | .004 |
| Hedonism - Security | 1.964 | 0.495 | 3.965 | .003 |
| Hedonism - Self-direction | 2.156 | 0.438 | 4.923 | <.001 |
| Hedonism - Stimulation | 0.639 | 0.359 | 1.779 | .749 |
| Hedonism - Tradition | 1.938 | 0.792 | 2.448 | .298 |
| Hedonism - Universalism | 3.546 | 1.083 | 3.274 | .036 |
| Power - Security | 0.182 | 0.580 | 0.313 | 1.00 |
| Power - Self-direction | 0.374 | 0.517 | 0.723 | .999 |
| Power - Stimulation | -1.144 | 0.491 | -2.329 | .370 |
| Power - Tradition | 0.155 | 0.839 | 0.184 | 1.00 |
| Power - Universalism | 1.763 | 1.122 | 1.572 | .862 |
| Security - Self-direction | 0.192 | 0.557 | 0.345 | 1.00 |
| Security - Stimulation | -1.326 | 0.518 | -2.559 | .237 |
| Security - Tradition | -0.027 | 0.842 | -0.032 | 1.00 |
| Security - Universalism | 1.582 | 1.135 | 1.393 | .930 |
| Self-direction - Stimulation | -1.518 | 0.467 | -3.251 | .038 |
| Self-direction - Tradition | -0.219 | 0.828 | -0.264 | 1.00 |
| Self-direction - Universalism | 1.390 | 1.116 | 1.246 | .965 |
| Stimulation - Tradition | 1.299 | 0.800 | 1.623 | .837 |
| Stimulation - Universalism | 2.908 | 1.095 | 2.654 | .193 |
| Tradition - Universalism | 1.609 | 1.296 | 1.241 | .966 |

*Notes:* Estimates are differences in estimated marginal means of vertical conflict scores between the values in the contrast’s column.

**Figures**

**Figure 1S.** PA facilitation and conflict mean rating scores per value category. Rating scores for values selected by participants are displayed.


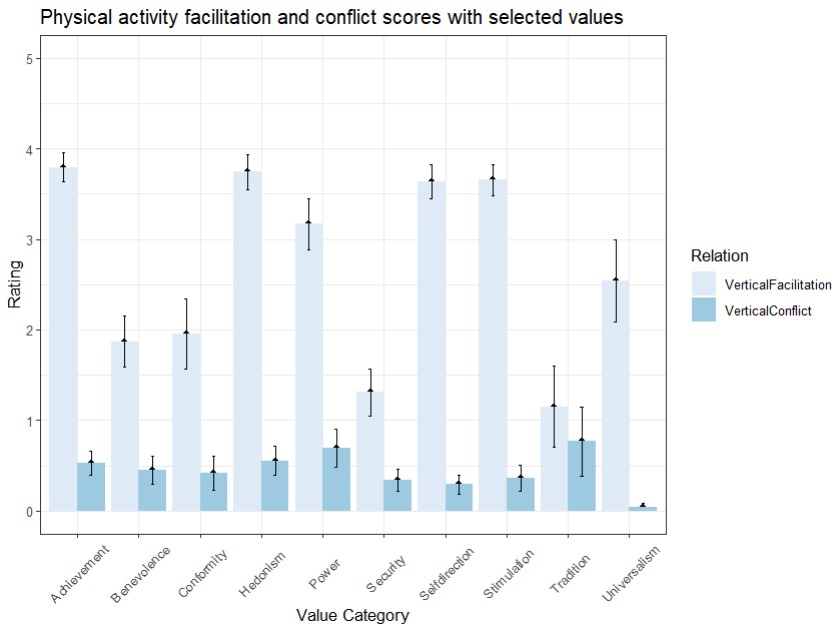


**Figure 2S**. HD facilitation and conflict mean rating scores per value category for the values selected by participants. Rating scores for values selected by participants are displayed.


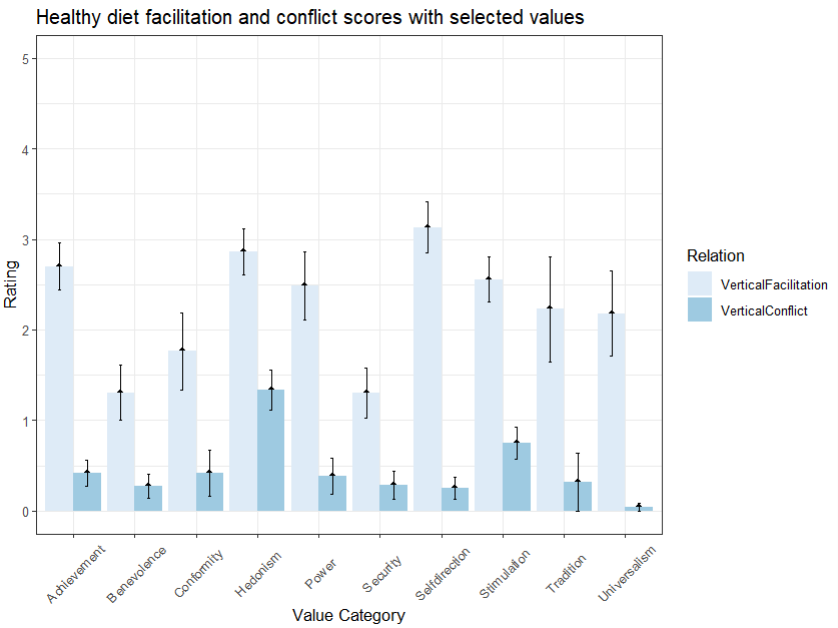

Supplement: Supplementary file 1 [file daf2f20c2c22a21c3401035e.docx]
